# Supplementary material for: Association of the Rheumatoid Arthritis Severity Variant rs26232 with the Invasive Activity of Synovial Fibroblasts
Source: MDPI journal article supplement (doi:10.3390/cells8101300), 2019-10-22
Supplement: s1 [file s1]

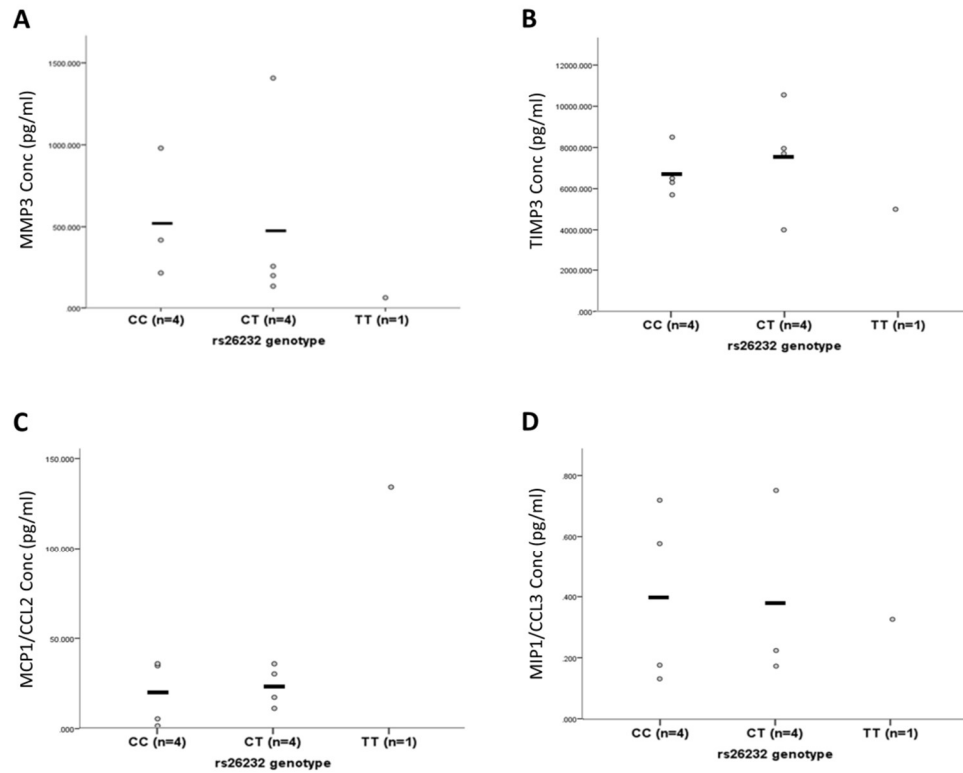

**Figure S1: rs26232 genotype is not associated with production of metalloproteases or macrophage chemokines by RASFs.** There was no association between rs26232 genotype and the production of (A) MMP3 ( $p=0.457$ ), (B) TIMP3 ( $p=0.374$ ), (C) MIP1 alpha ( $p=0.713$ ) or (D) MCP1 ( $p=0.982$ ). Each circle represents an individual donor. Horizontal black bars represent the cohort mean.

Supplementary Figure 2.

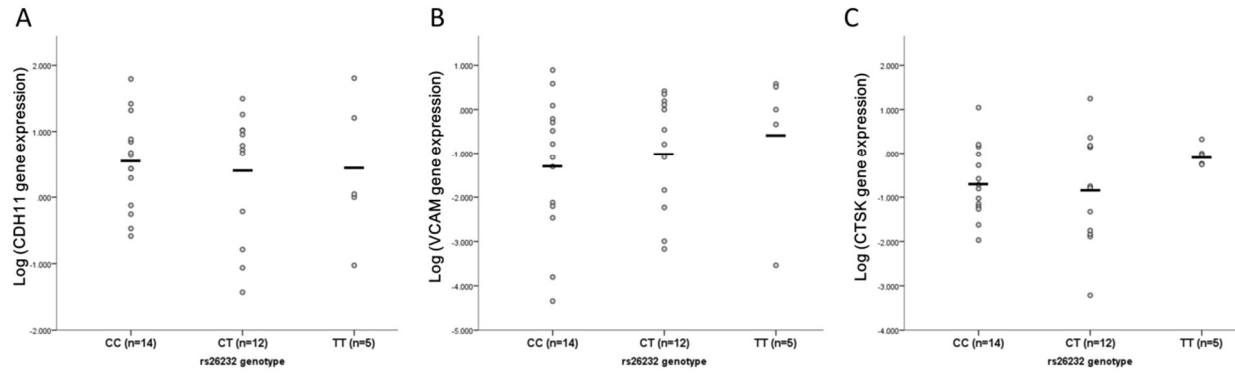

**Figure S2: rs26232 genotype is not associated with expression of adhesion markers or cathepsin K.** There was no association between rs26232 genotype and the production of (A) CDH11 gene expression ( $p=0.934$ ), (B) VCAM ( $p=0.509$ ), (C) CTSK ( $p=0.349$ ). Each circle represents an individual donor. Horizontal black bars represent the cohort mean.
