# Supplementary material for: Association of the Rheumatoid Arthritis Severity Variant rs26232 with the Invasive Activity of Synovial Fibroblasts
Source: MDPI journal article supplement (doi:10.3390/cells8101300), 2019-10-22
Supplement: s1 [file s1]

**Table S1.** Sequences of oligonucleotide primers used in RT-PCR (5'-3').

|                 | <b>Forward Primer (5'-3')</b> | <b>Reverse Primer (5'-3')</b> |
|-----------------|-------------------------------|-------------------------------|
| <b>C5orf30</b>  |                               |                               |
| All transcripts | AGGACCGTGTCTCAGGCTACC         | TGTTTGGAGCGTAAGGATGGC         |
| Variant 1       | GGACTTTGGGGCAGTACCTG          | GAGTCCCAAGGGAACACAGAC         |
| Variant 2       | CCTGGGCCATGGTACCTGG           | GAGTCCCAAGGGAACACAGAC         |
| Variant 3       | GGACTTTGGGGCAGTACCTG          | GAGTCCCAAGGGAACACAGAC         |
| <b>HPRT1</b>    |                               |                               |
|                 | ATGGACAGTGAACGTCTT            | GAGTCCCAAGGGAACACAGAC         |

**Table S2.** TaqMan Assay IDs used in RT-PCR

|                            | <b>Assay ID</b> | <b>Probe Exon Location</b> |
|----------------------------|-----------------|----------------------------|
| <b>ICAM1</b>               | Hs00164932_m1   | exon boundary 2-3          |
| <b>MMP14</b>               | Hs00237119_m1   | exon boundary 1-2          |
| <b>CDH11</b>               | Hs00901479_m1   | exon boundary 4-5          |
| <b>VCAM</b>                | Hs01003372_m1   | exon boundary 6-7          |
| <b>CTSK</b>                | Hs00166156_m1   | exon boundary 7-8          |
| <b>Eukaryotic 18S rRNA</b> | 4310893E        | n/a                        |
